# Supplementary material
Source: publisher site journal article supplement (https://www.spandidos-publications.com/5712/downloadSupplementary)
Supplement: Supplementary file 1 [file downloadSupplementary]

## Sheet: TNBC vs Healthy_Upstream miRNAs
			Table SII. Upstream regulatory microRNAs related to FZD8 and their target genes in TNBC.
			TNBC vs Healthy_Upstream miRNAs
mirnaName	cDE_n	cDE	cAll_n	cAll	P-value
hsa-miR-124-3p	134	631	1065	2110	1
hsa-miR-30c-5p	90	462	760	1500	1
hsa-miR-30d-5p	90	462	760	1500	1
hsa-miR-30b-5p	90	462	760	1500	1
hsa-miR-30a-5p	90	462	760	1500	1
hsa-miR-30e-5p	90	462	760	1500	1
hsa-miR-424-5p	108	407	747	1429	1
hsa-miR-15a-5p	108	407	746	1428	1
hsa-miR-15b-5p	108	407	746	1428	1
hsa-miR-497-5p	108	407	746	1428	1
hsa-miR-16-5p	108	407	746	1427	1
hsa-miR-6838-5p	108	407	746	1427	1
hsa-miR-195-5p	108	407	746	1427	1
hsa-miR-203a-3p	108	466	723	1415	1
hsa-miR-27a-3p	104	418	717	1345	1
hsa-miR-27b-3p	104	418	717	1345	1
hsa-miR-340-5p	95	456	661	1337	1
hsa-miR-519d-3p	95	382	712	1334	1
hsa-miR-526b-3p	94	381	711	1333	1
hsa-miR-9-5p	91	393	704	1333	1
hsa-miR-93-5p	94	381	710	1331	1
hsa-miR-17-5p	94	381	710	1331	1
hsa-miR-20b-5p	94	381	710	1331	1
hsa-miR-106a-5p	94	381	710	1331	1
hsa-miR-106b-5p	94	381	710	1331	1
hsa-miR-20a-5p	94	381	710	1331	1
hsa-miR-101-3p	77	444	635	1317	1
hsa-miR-181c-5p	79	417	637	1302	1
hsa-miR-181d-5p	79	417	637	1302	1
hsa-miR-181b-5p	79	417	637	1302	1
hsa-miR-181a-5p	79	417	637	1302	1
hsa-miR-4262	79	417	637	1302	1
hsa-miR-23b-3p	98	410	671	1280	1
hsa-miR-19b-3p	93	383	695	1280	1
hsa-miR-19a-3p	93	383	695	1280	1
hsa-miR-23a-3p	98	410	671	1280	1
hsa-miR-130a-5p	98	410	671	1280	1
hsa-miR-23c	98	410	671	1280	1
hsa-miR-302c-3p	95	377	658	1274	1
hsa-miR-182-5p	87	386	689	1270	1
hsa-miR-506-3p	91	407	622	1262	1
hsa-miR-29a-3p	79	355	618	1208	1
hsa-miR-29b-3p	79	355	618	1208	1
hsa-miR-29c-3p	79	355	618	1208	1
hsa-miR-3681-3p	95	350	634	1159	1
hsa-miR-216a-3p	95	350	634	1159	1
hsa-miR-128-3p	95	350	634	1159	1
hsa-let-7g-5p	68	318	596	1151	1
hsa-let-7b-5p	68	318	596	1151	1
hsa-let-7c-5p	68	318	596	1151	1
hsa-let-7a-5p	68	318	596	1151	1
hsa-let-7i-5p	68	318	596	1151	1
hsa-let-7e-5p	68	318	596	1151	1
hsa-miR-4500	68	318	596	1151	1
hsa-miR-4458	68	318	596	1151	1
hsa-miR-98-5p	68	318	596	1151	1
hsa-let-7f-5p	68	318	596	1151	1
hsa-let-7d-5p	68	318	596	1151	1
hsa-miR-200b-3p	79	385	563	1147	1
hsa-miR-200c-3p	79	385	563	1147	1
hsa-miR-429	79	385	563	1147	1
hsa-miR-1271-5p	84	325	643	1146	1
hsa-miR-96-5p	84	325	643	1146	1
hsa-miR-183-5p	73	341	582	1103	1
hsa-miR-218-5p	87	304	602	1045	1
hsa-miR-144-3p	70	339	496	1002	1
hsa-miR-4295	76	295	537	1001	1
hsa-miR-454-3p	76	295	537	1001	1
hsa-miR-130b-3p	76	295	537	1001	1
hsa-miR-130a-3p	76	295	537	1001	1
hsa-miR-3666	76	295	537	1001	1
hsa-miR-301b-3p	76	295	537	1001	1
hsa-miR-301a-3p	76	295	537	1001	1
hsa-miR-26b-5p	65	333	460	999	1
hsa-miR-26a-5p	65	333	460	999	1
hsa-miR-4465	65	333	460	999	1
hsa-miR-1297	65	333	460	999	1
hsa-miR-32-5p	56	273	526	987	1
hsa-miR-363-3p	56	273	526	987	1
hsa-miR-25-3p	56	273	526	987	1
hsa-miR-92a-3p	56	273	526	987	1
hsa-miR-92b-3p	56	273	526	987	1
hsa-miR-367-3p	56	273	526	987	1
hsa-miR-330-3p	67	275	518	976	1
hsa-miR-302d-3p	77	292	512	974	1
hsa-miR-302a-3p	77	292	512	974	1
hsa-miR-302b-3p	77	292	512	974	1
hsa-miR-520a-3p	77	292	512	974	1
hsa-miR-520c-3p	77	292	512	974	1
hsa-miR-372-3p	77	292	512	974	1
hsa-miR-302e	77	291	512	973	1
hsa-miR-373-3p	77	291	512	973	1
hsa-miR-520d-3p	77	291	512	973	1
hsa-miR-140-3p	61	288	487	965	1
hsa-miR-133a-3p	50	285	461	925	1
hsa-miR-5590-3p	68	280	473	901	1
hsa-miR-142-5p	68	280	473	901	1
hsa-miR-6835-3p	59	305	439	898	1
hsa-miR-186-5p	47	298	427	896	1
hsa-miR-4319	55	232	466	893	1
hsa-miR-125b-5p	55	232	466	893	1
hsa-miR-125a-5p	55	232	466	893	1
hsa-miR-145-5p	64	294	442	853	1
hsa-miR-613	51	279	394	852	1
hsa-miR-200a-3p	61	290	420	851	1
hsa-miR-1-3p	51	279	393	851	1
hsa-miR-5195-3p	64	292	442	851	1
hsa-miR-141-3p	61	290	420	851	1
hsa-miR-206	51	279	393	851	1
hsa-miR-153-3p	57	240	444	835	1
hsa-miR-495-3p	50	276	411	831	1
hsa-miR-5688	50	276	411	831	1
hsa-miR-135a-5p	58	242	430	816	1
hsa-miR-655-3p	58	267	395	816	1
hsa-miR-135b-5p	58	242	430	816	1
hsa-miR-374c-5p	58	267	395	816	1
hsa-miR-142-3p	44	283	358	814	1
hsa-miR-320b	51	262	394	803	1
hsa-miR-320d	51	262	394	803	1
hsa-miR-4429	51	262	394	803	1
hsa-miR-320c	51	262	394	803	1
hsa-miR-103a-3p	55	249	401	802	1
hsa-miR-107	55	249	401	802	1
hsa-miR-381-3p	46	258	383	800	1
hsa-miR-300	46	258	383	800	1
hsa-miR-873-5p	61	231	446	795	1
hsa-miR-148a-3p	47	238	372	771	1
hsa-miR-152-3p	47	238	372	771	1
hsa-miR-148b-3p	47	238	372	771	1
hsa-miR-493-5p	43	238	378	764	1
hsa-miR-211-5p	54	227	391	744	1
hsa-miR-204-5p	54	227	391	744	1
hsa-miR-24-3p	44	195	397	723	1
hsa-miR-34c-5p	53	173	436	721	1
hsa-miR-449a	53	173	436	721	1
hsa-miR-34a-5p	53	173	436	721	1
hsa-miR-449b-5p	53	173	436	721	1
hsa-miR-374b-5p	55	214	396	717	1
hsa-miR-374a-5p	55	214	396	717	1
hsa-miR-543	39	229	346	716	1
hsa-miR-129-5p	52	215	360	699	1
hsa-miR-133b	38	211	338	685	1
hsa-miR-520f-3p	46	198	343	674	1
hsa-miR-138-5p	47	171	374	666	1
hsa-miR-455-3p	44	189	349	652	1
hsa-miR-448	50	174	366	649	1
hsa-miR-582-5p	42	208	302	611	1
hsa-miR-199b-5p	39	172	318	607	1
hsa-miR-199a-5p	39	172	318	607	1
hsa-miR-377-3p	35	165	324	601	1
hsa-miR-369-3p	50	183	338	600	1
hsa-miR-494-3p	49	196	298	597	1
hsa-miR-653-5p	42	208	289	591	1
hsa-miR-505-3p	41	194	282	586	1
hsa-miR-22-3p	37	166	323	584	1
hsa-miR-410-3p	34	165	295	581	1
hsa-miR-205-5p	39	175	291	554	1
hsa-miR-155-5p	39	168	263	539	1
hsa-miR-7-5p	33	164	279	532	1
hsa-miR-6504-5p	35	141	289	529	1
hsa-miR-3064-5p	35	141	289	529	1
hsa-miR-670-3p	28	154	256	524	1
hsa-miR-33b-5p	45	156	303	509	1
hsa-miR-33a-5p	45	156	303	509	1
hsa-miR-129-1-3p	37	146	254	499	1
hsa-miR-129-2-3p	37	146	254	499	1
hsa-miR-760	43	136	275	497	1
hsa-miR-326	36	110	301	488	1
hsa-miR-330-5p	36	110	301	488	1
hsa-miR-221-3p	31	154	236	479	1
hsa-miR-222-3p	31	154	236	479	1
hsa-miR-143-3p	39	148	249	474	1
hsa-miR-6088	39	148	249	474	1
hsa-miR-4770	39	148	249	474	1
hsa-miR-665	35	105	283	470	1
hsa-miR-323a-3p	25	161	202	469	1
hsa-miR-338-3p	38	135	253	467	1
hsa-miR-149-5p	30	122	267	467	1
hsa-miR-199b-3p	33	163	224	456	1
hsa-miR-3129-5p	33	163	224	456	1
hsa-miR-199a-3p	33	163	224	456	1
hsa-miR-212-3p	35	157	232	455	1
hsa-miR-132-3p	35	157	232	455	1
hsa-miR-31-5p	29	131	247	454	1
hsa-miR-194-5p	36	163	208	445	1
hsa-miR-6807-3p	32	146	218	436	1
hsa-miR-421	25	162	196	436	1
hsa-miR-4782-3p	30	122	248	433	1
hsa-miR-6766-3p	30	122	248	433	1
hsa-miR-219a-5p	30	122	248	433	1
hsa-miR-6893-3p	33	92	261	432	1
hsa-miR-370-3p	33	92	261	432	1
hsa-miR-599	29	145	217	421	1
hsa-miR-224-5p	28	144	197	420	1
hsa-miR-485-5p	27	101	259	420	1
hsa-miR-6884-5p	27	101	259	420	1
hsa-miR-140-5p	24	143	190	415	1
hsa-miR-139-5p	31	157	209	411	1
hsa-miR-488-3p	25	134	210	410	1
hsa-miR-212-5p	37	100	246	409	1
hsa-miR-485-3p	31	136	196	409	1
hsa-miR-539-3p	31	136	196	409	1
hsa-miR-499b-5p	24	130	206	407	1
hsa-miR-499a-5p	24	130	206	407	1
hsa-miR-383-5p	23	123	218	404	1
hsa-miR-223-3p	35	142	195	402	1
hsa-miR-371a-5p	26	143	174	396	1
hsa-miR-299-3p	36	123	198	380	1
hsa-miR-802	23	139	167	374	1
hsa-miR-590-5p	26	115	188	366	1
hsa-miR-21-5p	26	115	187	365	1
hsa-miR-216b-5p	25	129	186	363	1
hsa-miR-365b-3p	17	110	167	358	1
hsa-miR-365a-3p	17	110	167	358	1
hsa-miR-196b-5p	18	107	184	357	1
hsa-miR-196a-5p	18	107	184	357	1
hsa-miR-216a-5p	13	116	178	356	1
hsa-miR-4644	25	84	214	355	1
hsa-miR-4306	25	84	214	355	1
hsa-miR-185-5p	25	84	214	355	1
hsa-miR-150-5p	21	99	179	338	1
hsa-miR-542-3p	30	96	182	335	1
hsa-miR-362-3p	24	106	162	334	1
hsa-miR-329-3p	24	106	162	334	1
hsa-miR-136-5p	13	104	159	334	1
hsa-miR-433-3p	15	119	140	333	1
hsa-miR-892c-3p	27	110	169	326	1
hsa-miR-452-5p	27	110	169	326	1
hsa-miR-4676-3p	27	110	169	326	1
hsa-miR-10a-5p	27	102	170	322	1
hsa-miR-10b-5p	27	102	170	322	1
hsa-miR-489-3p	20	117	152	318	1
hsa-miR-532-3p	18	78	182	313	1
hsa-miR-496	23	107	164	312	1
hsa-miR-4735-3p	19	91	160	310	1
hsa-miR-18a-5p	19	91	160	310	1
hsa-miR-18b-5p	19	91	160	310	1
hsa-miR-370-5p	19	85	159	307	1
hsa-miR-1193	19	85	159	307	1
hsa-miR-384	14	96	143	307	1
hsa-miR-409-3p	25	116	148	304	1
hsa-miR-342-3p	28	90	154	303	0.999998
hsa-miR-3167	10	79	150	303	1
hsa-miR-876-5p	10	79	150	303	1
hsa-miR-874-3p	22	83	161	301	1
hsa-miR-411-3p	23	97	150	298	1
hsa-miR-379-3p	23	97	150	298	1
hsa-miR-503-5p	19	92	146	297	1
hsa-miR-361-5p	23	93	144	284	1
hsa-miR-425-5p	24	91	140	274	1
hsa-miR-483-3p	10	73	134	273	1
hsa-miR-193a-3p	19	74	151	271	1
hsa-miR-193b-3p	19	74	151	271	1
hsa-miR-335-5p	13	89	131	271	1
hsa-miR-299-5p	21	87	126	268	1
hsa-miR-146a-5p	14	79	134	267	1
hsa-miR-146b-5p	14	79	134	267	1
hsa-miR-7153-5p	14	79	134	267	1
hsa-miR-1306-5p	19	69	156	264	1
hsa-miR-202-5p	17	98	114	264	1
hsa-miR-382-3p	13	89	122	262	1
hsa-miR-376c-3p	19	77	152	259	1
hsa-miR-544a	12	88	113	251	1
hsa-miR-376b-3p	14	69	130	250	1
hsa-miR-376a-3p	14	69	130	250	1
hsa-miR-758-3p	21	92	132	248	1
hsa-miR-455-5p	15	74	123	247	1
hsa-miR-1197	15	74	133	242	1
hsa-miR-532-5p	19	80	131	241	1
hsa-miR-504-5p	18	71	121	237	1
hsa-miR-331-3p	14	46	142	228	1
hsa-miR-3139	14	63	130	227	1
hsa-miR-28-5p	14	63	130	227	1
hsa-miR-708-5p	14	63	130	227	1
hsa-miR-490-3p	12	83	106	226	1
hsa-miR-190a-5p	12	64	123	217	1
hsa-miR-3184-5p	13	40	137	216	0.999998
hsa-miR-423-5p	13	40	137	216	0.999998
hsa-miR-122-5p	19	71	109	216	1
hsa-miR-411-5p	13	62	109	212	1
hsa-miR-382-5p	8	75	87	212	1
hsa-miR-378a-3p	11	61	104	208	1
hsa-miR-378i	11	61	104	208	1
hsa-miR-378e	11	61	104	208	1
hsa-miR-378h	11	61	104	208	1
hsa-miR-422a	11	61	104	208	1
hsa-miR-378b	11	61	104	208	1
hsa-miR-378f	11	61	104	208	1
hsa-miR-378d	11	61	104	208	1
hsa-miR-378c	11	61	104	208	1
hsa-miR-6866-3p	18	77	100	207	1
hsa-miR-188-5p	18	77	100	207	1
hsa-miR-215-5p	9	58	106	205	1
hsa-miR-192-5p	9	58	106	205	1
hsa-miR-1224-5p	13	65	113	205	1
hsa-miR-208a-3p	9	55	107	204	1
hsa-miR-208b-3p	9	55	107	204	1
hsa-miR-502-3p	17	67	104	201	1
hsa-miR-501-3p	17	67	104	201	1
hsa-miR-339-5p	17	51	120	197	0.999999
hsa-miR-328-3p	14	50	116	197	1
hsa-miR-214-5p	15	59	114	197	1
hsa-miR-219a-2-3p	9	57	92	190	1
hsa-miR-296-5p	12	29	135	189	0.999958
hsa-miR-3118	10	57	108	188	1
hsa-miR-134-5p	10	57	108	188	1
hsa-miR-346	16	47	113	181	0.999999
hsa-miR-193a-5p	8	41	99	180	1
hsa-miR-362-5p	15	58	92	178	1
hsa-miR-491-5p	11	42	104	177	1
hsa-miR-668-3p	10	55	90	173	1
hsa-miR-487a-3p	8	54	77	167	1
hsa-miR-154-3p	8	54	77	167	1
hsa-miR-486-5p	13	52	87	166	1
hsa-miR-1298-5p	11	58	85	165	1
hsa-miR-154-5p	12	52	87	162	1
hsa-miR-431-5p	11	45	88	161	1
hsa-miR-493-3p	12	54	76	160	0.999999
hsa-miR-324-5p	10	42	77	146	0.999999
hsa-miR-409-5p	8	45	62	130	1
hsa-miR-877-5p	11	31	69	125	0.997097
hsa-miR-28-3p	7	35	63	120	1
hsa-miR-379-5p	7	32	62	116	0.999997
hsa-miR-3529-5p	7	32	62	116	0.999997
hsa-miR-1251-5p	5	34	60	111	1
hsa-miR-875-5p	11	40	58	110	0.99999
hsa-miR-151a-3p	10	41	59	107	1
hsa-miR-296-3p	7	23	34	67	0.996421
hsa-miR-191-5p	5	17	37	61	0.999663
hsa-miR-126-3p	7	20	33	59	0.995432
hsa-miR-100-5p	3	21	31	58	1
hsa-miR-99a-5p	3	21	31	58	1
hsa-miR-99b-5p	3	21	31	58	1
hsa-miR-744-5p	2	7	28	40	0.99857
hsa-miR-210-3p	5	9	22	38	0.710318
hsa-miR-451a	2	8	14	27	0.988599
hsa-miR-184	4	7	19	26	0.942779
hsa-miR-127-3p	2	6	15	23	0.991401
hsa-miR-187-3p	3	6	16	21	0.988648
hsa-miR-423-3p	0	1	9	16	1
hsa-miR-487b-3p	1	2	9	15	0.857143
hsa-miR-615-3p	2	5	7	14	0.867133
hsa-miR-652-3p	1	6	5	14	0.972028
hsa-miR-1249-3p	0	2	8	13	1
hsa-let-7a-3p	0	2	3	11	1
hsa-let-7b-3p	0	2	3	11	1
hsa-miR-98-3p	0	2	3	11	1
hsa-let-7f-1-3p	0	2	3	11	1
hsa-miR-450a-5p	0	2	5	10	1
hsa-miR-9-3p	0	4	2	9	1
hsa-miR-151b	0	2	5	9	1
hsa-miR-151a-5p	0	2	5	9	1
hsa-miR-551b-3p	2	3	6	7	1
hsa-miR-551a	2	3	6	7	1
hsa-miR-126-5p	1	4	2	6	0.933333
hsa-miR-761	0	2	1	6	1
hsa-miR-214-3p	0	2	1	6	1
hsa-miR-3619-5p	0	2	1	6	1
hsa-miR-1185-1-3p	0	2	0	3	1
hsa-let-7f-2-3p	0	2	0	3	1
hsa-miR-1185-2-3p	0	2	0	3	1
hsa-miR-200a-5p	0	1	2	3	1
hsa-miR-200b-5p	0	1	2	3	1
hsa-miR-30e-3p	0	1	0	2	1
hsa-miR-16-1-3p	0	1	1	2	1
hsa-miR-195-3p	0	2	0	2	1
hsa-miR-30d-3p	0	1	0	2	1
hsa-miR-30a-3p	0	1	0	2	1
hsa-miR-16-2-3p	0	2	0	2	1
hsa-let-7a-2-3p	0	1	0	1	1
hsa-miR-7157-3p	0	1	0	1	1
hsa-let-7g-3p	0	1	0	1	1
hsa-miR-6737-3p	0	1	0	1	1
hsa-miR-5008-3p	0	1	0	1	1
FZD8, frizzled receptor 8; TNBC, triple-negative breast cancer; DE, differentially expressed; cDE_n, number of DE genes targeted by a particular miRNA; cDE, total number of DE genes; cAll_n, number of genes targeted by an miRNA, cAll, total number of genes.

## Sheet: Upstream miRNAs_FZD8 Related
		Table SII. Upstream regulatory microRNAs related to FZD8 and their target genes in TNBC.
		Upstream miRNAs_FZD8 Related
Name	# DE targets (-/all)	# targets (-/all)	P-value	Prediction Score
hsa-miR-124-3p	134 / 631	1065 / 2110	1	0.0102
hsa-miR-506-3p	91 / 407	622 / 1262	1	0.0056
hsa-miR-374a-5p	55 / 214	396 / 717	1	0.5816
hsa-miR-374b-5p	55 / 214	396 / 717	1	0.1056
hsa-miR-204-5p	54 / 227	391 / 744	1	0.2116
hsa-miR-211-5p	54 / 227	391 / 744	1	0.2028
hsa-miR-320c	51 / 262	394 / 803	1	0.9943
hsa-miR-4429	51 / 262	394 / 803	1	0.9995
hsa-miR-320d	51 / 262	394 / 803	1	0.9944
hsa-miR-320b	51 / 262	394 / 803	1	0.9942
hsa-miR-5688	50 / 276	411 / 831	1	0.98
hsa-miR-495-3p	50 / 276	411 / 831	1	0.0402
hsa-miR-369-3p	50 / 183	338 / 600	1	0.8074
hsa-miR-505-3p	41 / 194	282 / 586	1	0.8511
hsa-miR-22-3p	37 / 166	323 / 584	1	0.991
hsa-miR-410-3p	34 / 165	295 / 581	1	0.01341
hsa-miR-21-5p	26 / 115	187 / 365	1	0.9894
hsa-miR-590-5p	26 / 115	188 / 366	1	0.9894
hsa-miR-421	25 / 162	196 / 436	1	0.5973
hsa-miR-499a-5p	24 / 130	206 / 407	1	‎ 0.201‎0
hsa-miR-499b-5p	24 / 130	206 / 407	1	0.9721
hsa-miR-188-5p	18 / 77	100 / 207	1	0.9913
hsa-miR-6866-3p	18 / 77	100 / 207	1	0.9995
hsa-miR-154-5p	12 / 52	87 / 162	1	0.9877
hsa-miR-208b-3p	9 / 55	107 / 204	1	0.0011
hsa-miR-208a-3p	9 / 55	107 / 204	1	0.0021
hsa-miR-99b-5p	3 / 21	31 / 58	1	0.0022
hsa-miR-99a-5p	3 / 21	31 / 58	1	0.0006
Has-miR-100-5p‎	‎3 / 21‎	31 / 58	1	‎‎ 0.0750‎
FZD8, frizzled receptor 8; TNBC, triple-negative breast cancer; DE, differentially expressed.

## Sheet: hsa-miR-99a-3p
				Table SII. Upstream regulatory microRNAs related to FZD8 and their target genes in TNBC.
			hsa-miR-99a-3p
symbol	entrez	logfc	adjpv
PI15	51050	-2.71	0.00414
IGF1R	3480	-2.24	0.000523
CTDSPL	10217	-1.75	1.94e-06
ICMT	23463	1.61	1e-06
LRRC8B	23507	1.65	1e-06
SLC44A1	23446	1.78	1e-06
BMPR2	659	1.89	1e-06
FGFR3	2261	1.93	0.00391
AP1AR	55435	2.04	1e-06
CEP85	64793	2.32	1e-06
GMPS	8833	2.43	1e-06
TAOK1	57551	2.48	1e-06
SMARCA5	8467	2.55	1e-06
FKBP5	2289	2.9	1e-06
NIPBL	25836	3	1e-06
GRHL1	29841	3.14	1.28e-06
PPP1CB	5500	3.34	1e-06
MBNL1	4154	3.59	1e-06
DESI2	51029	3.97	1e-06
AGO2	27161	4.81	1e-06
TMEM30A	55754	5.03	1e-06
FZD8, frizzled receptor 8; TNBC, triple-negative breast cancer; adjpv, adjusted P-value.

## Sheet: hsa-miR-208a-3p
			Table SII. Upstream regulatory microRNAs related to FZD8 and their target genes in TNBC.
				hsa-miR-208a-3p
symbol	entrez	logfc	adjpv
MEIS1	4211	-2.21	1e-06
HOXD9	3235	-2.09	1e-06
EBF1	1879	-1.98	1e-06
TSHZ2	128553	-1.9	1e-06
PTPRG	5793	-1.86	4.85e-06
BHLHE41	79365	-1.72	0.00421
ZDHHC2	51201	-1.72	0.00153
TACC1	6867	-1.52	1.41e-05
MINOS1	440574	-1.5	1e-06
INSIG1	3638	1.53	1e-06
IRX5	10265	1.57	0.0013
EIF3J	8669	1.6	1e-06
HNRNPA2B1	3181	1.66	1e-06
USP24	23358	1.67	1e-06
USP47	55031	1.73	1e-06
SYAP1	94056	1.74	1e-06
PPM1D	8493	1.81	1e-06
MTF2	22823	1.82	1e-06
CDCA4	55038	1.85	1e-06
CHD9	80205	1.88	1e-06
CISD2	493856	1.9	1e-06
TRIM13	10206	1.9	1e-06
MED13	9969	1.93	1e-06
RYBP	23429	1.97	1e-06
PPP6C	5537	2.01	1e-06
AGO3	192669	2.01	1e-06
EIF5	1983	2.03	1e-06
E2F3	1871	2.13	1e-06
CCDC71L	168455	2.17	1e-06
RNF114	55905	2.24	1e-06
ENAH	55740	2.29	1e-06
CREBZF	58487	2.31	1e-06
UBE2V2	7336	2.38	1e-06
KIF5B	3799	2.41	1e-06
SNX2	6643	2.43	1e-06
CDC27	996	2.63	1e-06
SOX4	6659	2.64	1e-06
QKI	9444	2.78	1e-06
FAXC	84553	2.84	1.15e-06
FKBP5	2289	2.9	1e-06
PHLDA2	7262	2.94	1e-06
DYRK2	8445	2.99	1e-06
YBX1	4904	3.01	1e-06
KPNA3	3839	3.08	1e-06
PRKAR1A	5573	3.22	1e-06
H2AFZ	3015	3.27	1e-06
HNRNPC	3183	3.34	1e-06
RAB5C	5878	3.41	1e-06
ABI1	10006	3.44	1e-06
CDC6	990	3.47	1e-06
SHCBP1	79801	3.48	1e-06
DDX3X	1654	3.51	1e-06
SRPK2	6733	3.93	1e-06
EML4	27436	4.25	1e-06
RANBP9	10048	4.53	1e-06
FZD8, frizzled receptor 8; TNBC, triple-negative breast cancer; adjpv, adjusted P-value.

## Sheet: hsa-mir-208b-3p
			Table SII. Upstream regulatory microRNAs related to FZD8 and their target genes in TNBC.
			has-miR-208b-3p
symbol	entrez	logfc	adjpv
MEIS1	4211	-2.21	1e-06
HOXD9	3235	-2.09	1e-06
EBF1	1879	-1.98	1e-06
TSHZ2	128553	-1.9	1e-06
PTPRG	5793	-1.86	4.85e-06
BHLHE41	79365	-1.72	0.00421
ZDHHC2	51201	-1.72	0.00153
TACC1	6867	-1.52	1.41e-05
MINOS1	440574	-1.5	1e-06
INSIG1	3638	1.53	1e-06
IRX5	10265	1.57	0.0013
EIF3J	8669	1.6	1e-06
HNRNPA2B1	3181	1.66	1e-06
USP24	23358	1.67	1e-06
USP47	55031	1.73	1e-06
SYAP1	94056	1.74	1e-06
PPM1D	8493	1.81	1e-06
MTF2	22823	1.82	1e-06
CDCA4	55038	1.85	1e-06
CHD9	80205	1.88	1e-06
CISD2	493856	1.9	1e-06
TRIM13	10206	1.9	1e-06
MED13	9969	1.93	1e-06
RYBP	23429	1.97	1e-06
PPP6C	5537	2.01	1e-06
AGO3	192669	2.01	1e-06
EIF5	1983	2.03	1e-06
E2F3	1871	2.13	1e-06
CCDC71L	168455	2.17	1e-06
RNF114	55905	2.24	1e-06
ENAH	55740	2.29	1e-06
CREBZF	58487	2.31	1e-06
UBE2V2	7336	2.38	1e-06
KIF5B	3799	2.41	1e-06
SNX2	6643	2.43	1e-06
CDC27	996	2.63	1e-06
SOX4	6659	2.64	1e-06
QKI	9444	2.78	1e-06
FAXC	84553	2.84	1.15e-06
FKBP5	2289	2.9	1e-06
PHLDA2	7262	2.94	1e-06
DYRK2	8445	2.99	1e-06
YBX1	4904	3.01	1e-06
KPNA3	3839	3.08	1e-06
PRKAR1A	5573	3.22	1e-06
H2AFZ	3015	3.27	1e-06
HNRNPC	3183	3.34	1e-06
RAB5C	5878	3.41	1e-06
ABI1	10006	3.44	1e-06
CDC6	990	3.47	1e-06
SHCBP1	79801	3.48	1e-06
DDX3X	1654	3.51	1e-06
SRPK2	6733	3.93	1e-06
EML4	27436	4.25	1e-06
RANBP9	10048	4.53	1e-06
FZD8, frizzled receptor 8; TNBC, triple-negative breast cancer; adjpv, adjusted P-value.

## Sheet: hsa-miR-410-3p
				Table SII. Upstream regulatory microRNAs related to FZD8 and their target genes in TNBC.
				hsa-miR-410-3p
Symbol	Entrez	Logfc	Adjpv
ABLIM3	22885	-4.6	1e-06
TMTC1	83857	-4.2	1e-06
C1orf21	81563	-3.02	1e-06
KIT	3815	-2.98	0.00012
KLHL29	114818	-2.93	4.1e-05
ACVR1C	130399	-2.92	1e-06
RNF150	57484	-2.79	1.43e-05
HLF	3131	-2.77	1e-06
CYBRD1	79901	-2.74	1e-06
FOSB	2354	-2.64	4.03e-06
PCNX1	22990	-2.63	1e-06
RAP1A	5906	-2.51	1e-06
PRIMA1	145270	-2.13	6.34e-05
MCAM	4162	-1.95	1e-06
RGMB	285704	-1.88	1.26e-05
ZBTB20	26137	-1.87	1e-06
ETV5	2119	-1.85	0.000202
TBX5	6910	-1.85	1e-06
ZC3H6	376940	-1.82	1e-06
PARD3B	117583	-1.81	4.54e-05
TRPC1	7220	-1.79	1e-06
NR2F2	7026	-1.77	1e-06
PCSK5	5125	-1.76	1e-06
PTEN	5728	-1.75	1e-06
NRXN3	9369	-1.73	1e-06
TGFBR2	7048	-1.65	6.3e-06
FBXL20	84961	-1.64	1e-06
TMEM64	169200	-1.62	0.000128
IRS1	3667	-1.61	1e-06
DPYSL2	1808	-1.6	2.53e-05
PRKAR2B	5577	-1.58	0.00474
GUCY1A2	2977	-1.53	1e-06
SLC25A3	5250	-1.52	7.63e-06
MAP3K3	4215	-1.51	1e-06
USP6NL	9712	1.5	1e-06
MYNN	55892	1.5	1e-06
KDM3A	55818	1.51	1e-06
ARMC8	25852	1.51	1e-06
RCOR1	23186	1.52	1e-06
CPSF6	11052	1.53	1e-06
TNPO1	3842	1.58	1e-06
SNX27	81609	1.59	1e-06
TMED4	222068	1.6	1e-06
UBE2I	7329	1.61	1e-06
COX20	116228	1.61	1e-06
LIN7C	55327	1.61	1e-06
MDN1	23195	1.61	1e-06
BRD7	29117	1.62	1e-06
HMGB1	3146	1.63	1e-06
MSL2	55167	1.63	1e-06
GTF2B	2959	1.65	1e-06
NUP35	129401	1.65	1e-06
CDK19	23097	1.66	6.84e-06
TMEM108	66000	1.7	0.00407
B4GALT4	8702	1.7	1e-06
TCEB3	6924	1.71	1e-06
SERTAD4	56256	1.71	0.00126
NTN1	9423	1.72	0.000635
CHD7	55636	1.72	2.35e-05
PAPD4	167153	1.73	1e-06
HACD2	201562	1.77	2.65e-05
NOL7	51406	1.78	1e-06
TMEM106B	54664	1.78	1e-06
SLC44A1	23446	1.78	1e-06
DNAJC19	131118	1.81	1e-06
BTF3L4	91408	1.81	1e-06
NAA35	60560	1.81	1e-06
SLC2A1	6513	1.82	1.5e-05
ZFAND5	7763	1.82	1e-06
MFSD14A	64645	1.82	1e-06
C16orf87	388272	1.83	1e-06
CBX3	11335	1.85	1e-06
HSPA4L	22824	1.85	0.00393
BMPR2	659	1.89	1e-06
AHCTF1	25909	1.89	1e-06
DIMT1	27292	1.89	1e-06
FOXQ1	94234	1.89	0.02
SH3GLB1	51100	1.9	1e-06
XIAP	331	1.91	1e-06
MCFD2	90411	1.91	1e-06
FGFR3	2261	1.93	0.00391
DEK	7913	1.93	1e-06
MED13	9969	1.93	1e-06
RASAL2	9462	1.95	1e-06
NDFIP2	54602	1.96	1e-06
MXD1	4084	1.99	1e-06
AGO3	192669	2.01	1e-06
PLXDC2	84898	2.03	0.000236
PCNP	57092	2.04	1e-06
SMAD7	4092	2.05	1e-06
OSBP	5007	2.05	1e-06
GSK3B	2932	2.06	1e-06
PTGFRN	5738	2.06	1e-06
AGPAT5	55326	2.06	1e-06
BEND3	57673	2.06	1e-06
ETV6	2120	2.07	1e-06
CASK	8573	2.07	1e-06
CDS2	8760	2.08	1e-06
MAPRE2	10982	2.1	1e-06
TRAPPC3	27095	2.1	1e-06
RPS6KA3	6197	2.11	1e-06
G3BP1	10146	2.11	1e-06
MTDH	92140	2.11	1e-06
PLAGL2	5326	2.12	1e-06
UBXN7	26043	2.12	1e-06
RGS16	6004	2.14	3.14e-06
ARFIP1	27236	2.15	9.45e-06
SERBP1	26135	2.19	1e-06
VANGL2	57216	2.21	2.51e-05
IPO7	10527	2.23	1e-06
EMC2	9694	2.24	1e-06
KLF6	1316	2.25	1e-06
TTYH3	80727	2.25	1e-06
STAT3	6774	2.27	1e-06
ANKRD12	23253	2.27	1e-06
DNMT3A	1788	2.28	1e-06
RAI14	26064	2.3	1e-06
APPBP2	10513	2.34	1e-06
CBFB	865	2.39	1e-06
MEX3D	399664	2.39	1e-06
SNX2	6643	2.43	1e-06
MATR3	9782	2.45	1.41e-06
IFRD1	3475	2.49	1e-06
OSBPL3	26031	2.49	1e-06
KRIT1	889	2.5	1e-06
HNRNPU	3192	2.53	1e-06
MMP14	4323	2.55	1e-06
USP1	7398	2.61	1e-06
CD47	961	2.65	1e-06
STRN	6801	2.73	1e-06
FAM118B	79607	2.75	1e-06
SAR1B	51128	2.76	1e-06
QKI	9444	2.78	1e-06
NUFIP2	57532	2.83	1e-06
ITCH	83737	2.86	1e-06
UBE2W	55284	2.86	1e-06
CRK	1398	2.88	1e-06
MCMBP	79892	2.89	1e-06
FMNL2	114793	2.91	1e-06
CTDSPL2	51496	2.91	1e-06
UBE2B	7320	2.96	1e-06
FGFR1OP	11116	2.96	1e-06
NFIB	4781	2.98	2.1e-05
DCAF7	10238	3.01	1e-06
ARFGEF2	10564	3.12	1e-06
CDH11	1009	3.13	1e-06
CPEB4	80315	3.13	1e-06
CNKSR3	154043	3.22	1e-06
NUDT21	11051	3.23	1e-06
TM4SF1	4071	3.25	1e-06
GFPT1	2673	3.27	1e-06
BTG3	10950	3.36	1e-06
ZNF207	7756	3.52	1e-06
DEPDC1	55635	3.52	1e-06
BHLHE40	8553	3.55	1e-06
RHEB	6009	3.62	1e-06
ERO1A	30001	3.66	1e-06
RDX	5962	3.7	1e-06
UBE2H	7328	3.74	1e-06
TMEM158	25907	3.77	1e-06
MAPK1	5594	4.22	1e-06
TIGAR	57103	4.26	1e-06
AKIRIN1	79647	4.58	1e-06
ZNF146	7705	4.82	1e-06
CCNA2	890	5.19	1e-06
FZD8, frizzled receptor 8; TNBC, triple-negative breast cancer; adjpv, adjusted P-value.

## Sheet: hsa-miR-495-3p
			Table SII. Upstream regulatory microRNAs related to FZD8 and their target genes in TNBC.
				hsa-miR-495-3p
Symbol	Entrez	Logfc	Adjpv
TIMP4	7079	-5.46	1e-06
CLSTN2	64084	-4.55	1e-06
PGR	5241	-4.51	1e-06
PRICKLE2	166336	-4.03	1e-06
TESC	54997	-3.74	1e-06
KIAA1324	57535	-3.71	1e-06
MAOA	4128	-3.53	1e-06
ZNF703	80139	-3.08	1e-06
GRK3	157	-3.05	1e-06
C1orf21	81563	-3.02	1e-06
TMEM132C	92293	-2.99	1e-06
RNF150	57484	-2.79	1.43e-05
THRB	7068	-2.73	1e-06
PI15	51050	-2.71	0.00414
TENM2	57451	-2.7	1e-06
MYLK	4638	-2.54	3.28e-05
RAP1A	5906	-2.51	1e-06
LHX6	26468	-2.5	1e-06
THSD7A	221981	-2.38	1e-06
ATP7A	538	-2.22	1e-06
NAT8L	339983	-2.19	1e-06
ITGB5	3693	-2.17	2.31e-06
C10orf128	170371	-2.16	2.35e-05
TBX15	6913	-2.15	1e-06
CACNA2D1	781	-2.14	1e-06
SMAD9	4093	-2.14	2.26e-05
EHF	26298	-2.05	0.00218
MSX1	4487	-1.93	1e-06
JADE1	79960	-1.91	1e-06
ZBTB20	26137	-1.87	1e-06
PTPRG	5793	-1.86	4.85e-06
IVD	3712	-1.81	1e-06
YPEL2	388403	-1.77	1e-06
PTEN	5728	-1.75	1e-06
NRXN3	9369	-1.73	1e-06
BHLHE41	79365	-1.72	0.00421
PAK3	5063	-1.69	0.00266
PLXNA4	91584	-1.67	1e-06
PER2	8864	-1.65	2.32e-06
HCFC2	29915	-1.65	1e-06
IRS1	3667	-1.61	1e-06
TSC22D3	1831	-1.57	4.56e-06
PRICKLE1	144165	-1.57	1e-06
GPD1	2819	-1.56	1e-06
SPARC	6678	-1.55	9.65e-05
CRTAP	10491	-1.54	1e-06
RBPMS2	348093	-1.53	6.19e-05
ZFHX4	79776	-1.52	8.17e-05
FAM43A	131583	-1.5	2.12e-05
ZNF503	84858	-1.5	0.0005
KDM4A	9682	1.51	1e-06
RCOR1	23186	1.52	1e-06
INSIG1	3638	1.53	1e-06
CPSF6	11052	1.53	1e-06
DAG1	1605	1.54	1e-06
BCL2L1	598	1.55	1e-06
UAP1	6675	1.55	1e-06
SENP5	205564	1.56	5.43e-05
BCAP29	55973	1.57	1e-06
GSE1	23199	1.59	1.11e-05
ZNF292	23036	1.6	1e-06
ISCA2	122961	1.6	1e-06
PSMA5	5686	1.61	1e-06
EMP2	2013	1.62	1.03e-05
RAD18	56852	1.62	1e-06
HMGB1	3146	1.63	1e-06
NUP37	79023	1.63	1e-06
DCLRE1B	64858	1.64	1e-06
GTF2B	2959	1.65	1e-06
FAM199X	139231	1.67	1.06e-06
DSTN	11034	1.69	1e-06
ZCCHC14	23174	1.69	1e-06
SZRD1	26099	1.7	1e-06
RBM28	55131	1.72	1e-06
CHD7	55636	1.72	2.35e-05
HSPA5	3309	1.73	1e-06
SLC35A3	23443	1.73	1e-06
HSP90AA1	3320	1.74	1e-06
PPP2CA	5515	1.76	1e-06
SLAIN2	57606	1.76	1e-06
HIPK1	204851	1.77	1e-06
POLDIP3	84271	1.78	1e-06
ZC3H15	55854	1.78	1e-06
SLC44A1	23446	1.78	1e-06
QSER1	79832	1.79	1e-06
ABCE1	6059	1.81	1e-06
BTF3L4	91408	1.81	1e-06
ZFAND3	60685	1.81	1e-06
ZFAND5	7763	1.82	1e-06
MTF2	22823	1.82	1e-06
LCLAT1	253558	1.82	1e-06
RNF8	9025	1.84	1e-06
SLF2	55719	1.84	1e-06
FAM126B	285172	1.84	1e-06
HSPA4L	22824	1.85	0.00393
MYO10	4651	1.87	1e-06
MED14	9282	1.87	1e-06
FXR1	8087	1.89	1e-06
AP1G1	164	1.9	1e-06
CISD2	493856	1.9	1e-06
TM9SF2	9375	1.9	1e-06
TRIM13	10206	1.9	1e-06
XIAP	331	1.91	1e-06
CEP57	9702	1.91	1e-06
TUBB	203068	1.92	1e-06
TSC22D2	9819	1.93	1e-06
RASAL2	9462	1.95	1e-06
SP1	6667	1.97	5.76e-06
RYBP	23429	1.97	1e-06
PPP6C	5537	2.01	1e-06
KLHDC10	23008	2.01	1e-06
EFCAB14	9813	2.02	1e-06
ZBTB21	49854	2.05	1e-06
CKAP4	10970	2.06	1e-06
PDCD10	11235	2.06	1e-06
HMGCR	3156	2.09	1e-06
FOXK2	3607	2.09	1e-06
SGK494	124923	2.09	1e-06
TXNRD1	7296	2.1	1e-06
MAPRE2	10982	2.1	1e-06
RPS6KA3	6197	2.11	1e-06
G3BP1	10146	2.11	1e-06
PLAGL2	5326	2.12	1e-06
CYB5B	80777	2.12	1e-06
E2F3	1871	2.13	1e-06
SEL1L	6400	2.14	1e-06
RASD2	23551	2.14	0.000306
SMIM7	79086	2.15	1e-06
DIS3	22894	2.15	1e-06
CRLS1	54675	2.17	1e-06
ZBTB10	65986	2.18	1e-06
GRSF1	2926	2.18	1e-06
RHOQ	23433	2.19	1e-06
UBE2Z	65264	2.19	1e-06
TMEM43	79188	2.2	1e-06
IMPACT	55364	2.2	1e-06
CBX4	8535	2.22	1e-06
STAG2	10735	2.22	1e-06
RNF114	55905	2.24	1e-06
AP3M1	26985	2.26	1e-06
CDH1	999	2.27	9.52e-05
RBM12	10137	2.27	1e-06
MIA3	375056	2.27	1e-06
DNMT3A	1788	2.28	1e-06
CELF1	10658	2.28	1e-06
ENAH	55740	2.29	1e-06
SUPT16H	11198	2.3	1e-06
CDC73	79577	2.3	1e-06
NETO2	81831	2.31	6.92e-05
CREBZF	58487	2.31	1e-06
CEP85	64793	2.32	1e-06
USP46	64854	2.32	1e-06
WNK1	65125	2.32	1e-06
TMEM50B	757	2.33	1e-06
HMGCS1	3157	2.33	2.33e-06
GABBR2	9568	2.33	0.00197
RASA1	5921	2.34	1e-06
APPBP2	10513	2.34	1e-06
RNF138	51444	2.34	1e-06
AGFG1	3267	2.35	1e-06
PEG3	5178	2.35	0.02
ILF3	3609	2.36	1e-06
TNFRSF21	27242	2.37	1e-06
MGAT2	4247	2.38	1e-06
U2SURP	23350	2.38	1e-06
HNRNPH1	3187	2.39	1e-06
RAN	5901	2.4	1e-06
RAB2A	5862	2.42	1e-06
GMPS	8833	2.43	1e-06
TMEM65	157378	2.45	1e-06
CAND1	55832	2.48	1e-06
SHMT2	6472	2.49	1e-06
UBE2Q1	55585	2.5	1e-06
CYLD	1540	2.52	1e-06
FOSL2	2355	2.52	1e-06
HNRNPU	3192	2.53	1e-06
PSME3	10197	2.53	1e-06
MMP14	4323	2.55	1e-06
SNRPB	6628	2.58	1e-06
POLR1C	9533	2.59	1e-06
MFHAS1	9258	2.61	1e-06
LLPH	84298	2.61	1e-06
ZNF281	23528	2.63	1e-06
IRF2BP2	359948	2.63	1e-06
HSPA13	6782	2.66	1e-06
PTPRF	5792	2.69	1e-06
PEX13	5194	2.7	1e-06
TTPAL	79183	2.7	1e-06
ACTR3	10096	2.71	1e-06
STRN	6801	2.73	1e-06
SEC23IP	11196	2.73	1e-06
CDK6	1021	2.75	1e-06
YME1L1	10730	2.75	1e-06
SDC2	6383	2.76	2.53e-06
UBA6	55236	2.79	1e-06
BZW1	9689	2.81	1e-06
C6orf62	81688	2.83	1e-06
NUFIP2	57532	2.83	1e-06
STRBP	55342	2.84	1e-06
HSPA4	3308	2.86	1e-06
UBE2W	55284	2.86	1e-06
RCN2	5955	2.87	1e-06
MCMBP	79892	2.89	1e-06
FKBP5	2289	2.9	1e-06
PRKX	5613	2.91	1e-06
DDIT4	54541	2.95	1e-06
NUP155	9631	2.96	1e-06
FGFR1OP	11116	2.96	1e-06
LRIF1	55791	2.96	1e-06
CBX5	23468	2.96	1e-06
NFIB	4781	2.98	2.1e-05
KDM5B	10765	2.98	1e-06
DYRK2	8445	2.99	1e-06
SSX2IP	117178	2.99	1e-06
NFYB	4801	3.07	1e-06
RBFOX2	23543	3.09	1e-06
ARFGEF2	10564	3.12	1e-06
TM9SF3	56889	3.13	1e-06
PRUNE1	58497	3.15	1e-06
NUCKS1	64710	3.19	1e-06
HNRNPF	3185	3.2	1e-06
DEDD	9191	3.21	1e-06
PRKAR1A	5573	3.22	1e-06
CNKSR3	154043	3.22	1e-06
ZNF148	7707	3.24	1e-06
TM4SF1	4071	3.25	1e-06
USP38	84640	3.26	1e-06
CYB5R4	51167	3.28	1e-06
F11R	50848	3.29	1e-06
CD164	8763	3.3	1e-06
CDCA2	157313	3.31	1e-06
BCLAF1	9774	3.32	1e-06
KIAA1033	23325	3.32	1e-06
DICER1	23405	3.32	1e-06
PPP1CB	5500	3.34	1e-06
FBXO28	23219	3.39	1e-06
ARIH1	25820	3.39	1e-06
RAB10	10890	3.4	1e-06
SSR1	6745	3.41	1e-06
PRELID3B	51012	3.41	1e-06
CSNK1A1	1452	3.43	1e-06
IL13RA1	3597	3.44	1e-06
CDC6	990	3.47	1e-06
DDX3X	1654	3.51	1e-06
ZNF207	7756	3.52	1e-06
ELAVL1	1994	3.55	1e-06
RHEB	6009	3.62	1e-06
ERO1A	30001	3.66	1e-06
YTHDF3	253943	3.68	1e-06
PAK2	5062	3.77	1e-06
SLC25A32	81034	3.84	1e-06
PDE7A	5150	3.91	1e-06
HN1	4851	3.96	1e-06
ATP6V1C1	528	3.98	1e-06
SRSF10	10772	4.02	1e-06
GMFB	2764	4.11	1e-06
PDLIM5	10611	4.24	1e-06
TWF1	5756	4.3	1e-06
RPRD1A	55197	4.34	1e-06
NDC1	55706	4.34	1e-06
UHMK1	127933	4.41	1e-06
PGK1	5230	4.57	1e-06
PHF19	26147	4.63	1e-06
UBE2N	7334	4.68	1e-06
KPNA2	3838	4.74	1e-06
PTP4A1	7803	5.01	1e-06
TMED2	10959	5.03	1e-06
EZR	7430	5.14	1e-06
SRSF1	6426	5.18	1e-06
BUB1	699	5.31	1e-06
CBX2	84733	5.32	1e-06
CDCA7	83879	5.67	1e-06
TPD52	7163	6.29	1e-06
CDK1	983	6.37	1e-06
EIF5A	1984	6.56	1e-06
KIAA0101	9768	6.81	1e-06
FZD8, frizzled receptor 8; TNBC, triple-negative breast cancer; adjpv, adjusted P-value.

## Sheet: hsa-miR-99b-3p
			Table SII. Upstream regulatory microRNAs related to FZD8 and their target genes in TNBC.
			hsa-miR-99b-3p
Symbol	Entrez	Logfc	Adjpv
PI15	51050	-2.71	0.00414
IGF1R	3480	-2.24	0.000523
CTDSPL	10217	-1.75	1.94e-06
ICMT	23463	1.61	1e-06
LRRC8B	23507	1.65	1e-06
SLC44A1	23446	1.78	1e-06
BMPR2	659	1.89	1e-06
FGFR3	2261	1.93	0.00391
AP1AR	55435	2.04	1e-06
CEP85	64793	2.32	1e-06
GMPS	8833	2.43	1e-06
TAOK1	57551	2.48	1e-06
SMARCA5	8467	2.55	1e-06
FKBP5	2289	2.9	1e-06
NIPBL	25836	3	1e-06
GRHL1	29841	3.14	1.28e-06
PPP1CB	5500	3.34	1e-06
MBNL1	4154	3.59	1e-06
DESI2	51029	3.97	1e-06
AGO2	27161	4.81	1e-06
TMEM30A	55754	5.03	1e-06
FZD8, frizzled receptor 8; TNBC, triple-negative breast cancer; adjpv, adjusted P-value.

## Sheet: hsa-miR-506-3p
				Table SII. Upstream regulatory microRNAs related to FZD8 and their target genes in TNBC.
				has-miR-506-3p
Symbol	Entrez	Logfc	Adjpv
ZBTB16	7704	-5.38	1e-06
SCN4B	6330	-4.98	1e-06
TGFBR3	7049	-4.37	1e-06
PRICKLE2	166336	-4.03	1e-06
NFIA	4774	-3.85	1e-06
EDNRB	1910	-3.62	1e-06
PDE2A	5138	-3.57	1e-06
JAM2	58494	-3.56	1e-06
LIPE	3991	-3.4	1e-06
MYZAP	100820829	-3.21	1e-06
ZCCHC24	219654	-2.93	1e-06
GLI3	2737	-2.89	1e-06
SETBP1	26040	-2.87	1e-06
PDGFA	5154	-2.86	1e-06
DCHS1	8642	-2.85	1e-06
HLF	3131	-2.77	1e-06
SLC40A1	30061	-2.75	1e-06
THRB	7068	-2.73	1e-06
SLC27A1	376497	-2.6	1e-06
FBRSL1	57666	-2.6	1e-06
LIMCH1	22998	-2.47	4.32e-05
AHNAK	79026	-2.46	1e-06
NR3C2	4306	-2.45	1e-06
TMEM178A	130733	-2.43	1e-06
PDE3B	5140	-2.32	1e-06
CREBRF	153222	-2.27	1e-06
RALGPS2	55103	-2.26	3.19e-05
PLEKHA6	22874	-2.26	1e-06
ATP7A	538	-2.22	1e-06
MITF	4286	-2.19	1e-06
ALCAM	214	-2.17	0.000945
CACNA2D1	781	-2.14	1e-06
CTDSP1	58190	-2.09	1e-06
PLEKHH1	57475	-2.07	3.2e-06
LIMA1	51474	-2.06	1.54e-06
ACVR2A	92	-2.01	1e-06
ALDH6A1	4329	-2	1e-06
IL17RD	54756	-2	0.00148
RHOU	58480	-2	5.88e-06
FSTL1	11167	-1.99	1e-06
EBF1	1879	-1.98	1e-06
CPS1	1373	-1.97	1e-06
NDFIP1	80762	-1.97	1e-06
JADE1	79960	-1.91	1e-06
FKBP1B	2281	-1.9	1.11e-06
AMOTL1	154810	-1.9	1e-06
TSHZ2	128553	-1.9	1e-06
CCDC50	152137	-1.89	1e-06
STEAP2	261729	-1.89	0.00014
SLC7A8	23428	-1.88	1e-06
ZBTB20	26137	-1.87	1e-06
GOLGA8N	643699	-1.84	1e-06
DUSP6	1848	-1.83	0.000469
CEP68	23177	-1.83	1e-06
EBF3	253738	-1.83	0.000115
MAP1B	4131	-1.81	0.00033
NFIX	4784	-1.78	1.04e-06
MYRIP	25924	-1.78	0.000111
ZBTB7C	201501	-1.77	0.00382
HIC1	3090	-1.76	1e-06
PPM1F	9647	-1.76	1e-06
CTDSPL	10217	-1.75	1.94e-06
SPRY1	10252	-1.75	1e-06
SLK	9748	-1.74	1e-06
FBXL7	23194	-1.73	1e-06
RXRA	6256	-1.71	0.000446
SPRY2	10253	-1.71	0.00234
MARK1	4139	-1.7	1e-06
B4GALT6	9331	-1.69	1.33e-06
ECE1	1889	-1.67	1e-06
BACE1	23621	-1.67	1e-06
PNPLA2	57104	-1.67	1e-06
FAM219B	57184	-1.67	1e-06
ETV1	2115	-1.66	0.000909
SGSM2	9905	-1.65	1e-06
NHSL2	340527	-1.62	1e-06
TRIM9	114088	-1.62	9.97e-05
GPAT3	84803	-1.62	0.00389
BICC1	80114	-1.61	0.00108
DYM	54808	-1.6	1e-06
TACC2	10579	-1.56	3.35e-05
ELL2	22936	-1.54	0.000446
NFIC	4782	-1.53	1e-06
COL4A3BP	10087	-1.53	1e-06
TACC1	6867	-1.52	1.41e-05
SUGT1	10910	-1.52	1e-06
MAP3K3	4215	-1.51	1e-06
ADGRA2	25960	-1.51	1e-06
FRS2	10818	-1.5	5.55e-05
ZNF503	84858	-1.5	0.0005
ELOVL5	60481	-1.5	1.44e-06
MYNN	55892	1.5	1e-06
RRP36	88745	1.5	1e-06
ANXA7	310	1.51	1e-06
FEM1B	10116	1.51	1e-06
PAPSS2	9060	1.52	0.00195
RCOR1	23186	1.52	1e-06
TTC37	9652	1.53	1e-06
CHMP2B	25978	1.56	1e-06
PIGM	93183	1.56	1e-06
BICD1	636	1.57	0.000113
MAP2K4	6416	1.59	1e-06
TMEM181	57583	1.59	7.8e-06
EIF3J	8669	1.6	1e-06
DCUN1D5	84259	1.6	1e-06
ZNF292	23036	1.6	1e-06
ICMT	23463	1.61	1e-06
RSRC2	65117	1.62	1e-06
E2F6	1876	1.64	1e-06
ITFG1	81533	1.64	1e-06
USP48	84196	1.64	1e-06
TCF3	6929	1.65	1e-06
GIT2	9815	1.65	1e-06
CSTF2	1478	1.66	1e-06
AP1M2	10053	1.66	0.00444
CHD1	1105	1.67	1e-06
FAM199X	139231	1.67	1.06e-06
EDC3	80153	1.67	1e-06
USP24	23358	1.67	1e-06
SERP1	27230	1.67	1e-06
TRAM2	9697	1.69	1e-06
ZCCHC14	23174	1.69	1e-06
TFDP2	7029	1.71	1.5e-06
SERTAD4	56256	1.71	0.00126
THEM6	51337	1.72	0.000243
SSH1	54434	1.72	1e-06
PAPD4	167153	1.73	1e-06
SORD	6652	1.73	1.02e-06
PPARA	5465	1.75	1e-06
GPR137B	7107	1.75	1e-06
BLOC1S6	26258	1.75	1e-06
SLAIN2	57606	1.76	1e-06
HIPK1	204851	1.77	1e-06
GDAP2	54834	1.77	1e-06
PBX3	5090	1.78	5.92e-06
SLC44A1	23446	1.78	1e-06
CDK4	1019	1.79	1e-06
MYO5A	4644	1.79	1e-06
ST8SIA1	6489	1.79	0.00722
QSER1	79832	1.79	1e-06
METTL13	51603	1.79	1e-06
NR1D2	9975	1.81	5.48e-06
CEP350	9857	1.82	1e-06
MTF2	22823	1.82	1e-06
LCLAT1	253558	1.82	1e-06
MFSD14A	64645	1.82	1e-06
ARG2	384	1.83	0.000681
USO1	8615	1.83	1e-06
ATP6V1G1	9550	1.83	1e-06
PLXNA3	55558	1.83	1e-06
PALLD	23022	1.84	8.68e-05
SLC50A1	55974	1.84	1e-06
TXLNA	200081	1.86	1e-06
LOX	4015	1.86	0.00168
SUB1	10923	1.86	1e-06
MYO10	4651	1.87	1e-06
SPAG9	9043	1.88	1e-06
SEC61A2	55176	1.88	1e-06
CDK12	51755	1.89	1e-06
KLHL42	57542	1.89	4.39e-06
FOXQ1	94234	1.89	0.02
MBOAT2	129642	1.89	1e-06
AP1G1	164	1.9	1e-06
CISD2	493856	1.9	1e-06
FAR1	84188	1.9	1e-06
TCEB1	6921	1.92	1e-06
ABHD3	171586	1.93	1e-06
SFT2D2	375035	1.94	1e-06
RASAL2	9462	1.95	1e-06
TBC1D5	9779	1.95	1e-06
PGM2	55276	1.95	1e-06
CCT5	22948	1.95	1e-06
SLC31A1	1317	1.96	1e-06
NDFIP2	54602	1.96	1e-06
RALA	5898	1.97	1e-06
SP1	6667	1.97	5.76e-06
MFSD14B	84641	1.97	1e-06
VPS13A	23230	1.97	1e-06
RYBP	23429	1.97	1e-06
DAP	1611	1.98	1e-06
EXOSC2	23404	1.99	1e-06
C21orf91	54149	2	4.66e-06
WSB2	55884	2	1e-06
TMEM267	64417	2	1e-06
MAPK14	1432	2.01	1e-06
KRAS	3845	2.01	1e-06
TMEM248	55069	2.01	1e-06
AGO3	192669	2.01	1e-06
PAPOLG	64895	2.01	1e-06
HMGA1	3159	2.02	1e-06
EFCAB14	9813	2.02	1e-06
SEC63	11231	2.03	1e-06
CCDC117	150275	2.03	1e-06
CERS2	29956	2.03	1e-06
OSBP	5007	2.05	1e-06
LPP	4026	2.06	1e-06
PTGFRN	5738	2.06	1e-06
PDCD10	11235	2.06	1e-06
ZBTB38	253461	2.06	1e-06
BEND3	57673	2.06	1e-06
ATRX	546	2.07	1e-06
CASK	8573	2.07	1e-06
OXSR1	9943	2.07	1e-06
FOXK2	3607	2.09	1e-06
SOS1	6654	2.09	1e-06
COL4A1	1282	2.11	5.5e-06
STT3A	3703	2.11	1e-06
G3BP1	10146	2.11	1e-06
MFSD6	54842	2.11	4.55e-06
NXT2	55916	2.11	0.000358
MTDH	92140	2.11	1e-06
PLAGL2	5326	2.12	1e-06
SOCS3	9021	2.12	9.48e-06
NANP	140838	2.12	1e-06
VDAC3	7419	2.13	1e-06
SIGMAR1	10280	2.13	1e-06
RRBP1	6238	2.15	1e-06
NEK6	10783	2.15	1e-06
GOLT1B	51026	2.15	1e-06
ARFIP1	27236	2.15	9.45e-06
P4HA1	5033	2.16	1e-06
TMED8	283578	2.16	1e-06
SBK1	388228	2.16	1e-06
TJP1	7082	2.19	1e-06
USP14	9097	2.19	1e-06
RHOQ	23433	2.19	1e-06
KDM5A	5927	2.2	1e-06
ATF7IP	55729	2.2	1e-06
DENR	8562	2.21	1e-06
VANGL2	57216	2.21	2.51e-05
STARD4	134429	2.22	1e-06
STAG2	10735	2.22	1e-06
NAB1	4664	2.23	1e-06
KLF6	1316	2.25	1e-06
YIPF6	286451	2.25	1e-06
THUMPD3	25917	2.25	1e-06
PPM1A	5494	2.26	1e-06
AGPS	8540	2.26	1e-06
AMMECR1	9949	2.26	1e-06
AP3M1	26985	2.26	1e-06
STAT3	6774	2.27	1e-06
NUP58	9818	2.28	1e-06
KIAA1147	57189	2.29	1e-06
UBE2G2	7327	2.3	1e-06
CDC73	79577	2.3	1e-06
RAI14	26064	2.3	1e-06
HIPK2	28996	2.3	1e-06
C1GALT1	56913	2.31	1e-06
PCCB	5096	2.32	1e-06
BCAT1	586	2.33	1e-06
RAP2A	5911	2.34	1e-06
TMEM168	64418	2.34	1e-06
PRRC1	133619	2.35	1e-06
AGFG1	3267	2.35	1e-06
PEG3	5178	2.35	0.02
TTL	150465	2.35	1e-06
CSTF3	1479	2.36	1e-06
MAGT1	84061	2.36	1e-06
UBE2V2	7336	2.38	1e-06
CBFB	865	2.39	1e-06
LARP1	23367	2.39	1e-06
CXADR	1525	2.4	0.000148
RPS6KB1	6198	2.4	1e-06
CMTM6	54918	2.4	1e-06
ARHGDIA	396	2.42	1e-06
RAB2A	5862	2.42	1e-06
ACOX1	51	2.43	1e-06
TMEM45A	55076	2.43	0.000452
IDE	3416	2.44	1e-06
RYK	6259	2.45	1e-06
SDAD1	55153	2.45	1e-06
GMCL1	64395	2.45	1e-06
SURF4	6836	2.46	1e-06
IMPAD1	54928	2.46	1e-06
ZNF318	24149	2.46	1e-06
RELA	5970	2.47	1e-06
RAB14	51552	2.47	1e-06
TIPRL	261726	2.47	1e-06
C4orf46	201725	2.48	1e-06
GGA2	23062	2.48	1e-06
DNASE2	1777	2.49	1e-06
IQGAP1	8826	2.49	1e-06
OSBPL3	26031	2.49	1e-06
CYLD	1540	2.52	1e-06
TUBG1	7283	2.52	1e-06
ATP6V0A2	23545	2.53	1e-06
COPZ1	22818	2.54	1e-06
ARPP19	10776	2.58	1e-06
DCTN4	51164	2.6	1e-06
KDM1B	221656	2.61	1e-06
CDC27	996	2.63	1e-06
MAP7	9053	2.63	1e-06
IRF2BP2	359948	2.63	1e-06
RBMS1	5937	2.64	1e-06
WDFY1	57590	2.64	1e-06
PEA15	8682	2.65	1e-06
ARF6	382	2.66	1e-06
ZNF706	51123	2.66	1e-06
JPH1	56704	2.67	1e-06
MAN2A1	4124	2.68	1e-06
ITPR3	3710	2.71	1e-06
STRN	6801	2.73	1e-06
CDK6	1021	2.75	1e-06
SDC2	6383	2.76	2.53e-06
BCL2L11	10018	2.76	1e-06
SAR1B	51128	2.76	1e-06
NEMP1	23306	2.76	1e-06
QKI	9444	2.78	1e-06
TOR3A	64222	2.78	1e-06
UBA6	55236	2.79	1e-06
MPZL1	9019	2.8	1e-06
OGFRL1	79627	2.8	1e-06
KDELR2	11014	2.81	1e-06
ISG20L2	81875	2.81	1e-06
COTL1	23406	2.81	1e-06
ESYT2	57488	2.82	1e-06
NUFIP2	57532	2.83	1e-06
ATL3	25923	2.83	1e-06
VANGL1	81839	2.84	1e-06
UBE2W	55284	2.86	1e-06
EFNA5	1946	2.87	2.47e-06
PRKX	5613	2.91	1e-06
OSBPL11	114885	2.92	1e-06
UBE2B	7320	2.96	1e-06
CBX5	23468	2.96	1e-06
NFIB	4781	2.98	2.1e-05
ZFP36L2	678	2.99	1e-06
DYRK2	8445	2.99	1e-06
SLBP	7884	3.01	1e-06
TIA1	7072	3.02	1e-06
RNF213	57674	3.03	1e-06
TAB2	23118	3.05	1e-06
PRPF40A	55660	3.08	1e-06
CEP152	22995	3.08	1e-06
MACF1	23499	3.08	1e-06
ARFGEF2	10564	3.12	1e-06
CDH11	1009	3.13	1e-06
FAM20B	9917	3.16	1e-06
C16orf72	29035	3.18	1e-06
PSEN1	5663	3.19	1e-06
IGF2R	3482	3.2	1e-06
LMNB1	4001	3.2	1e-06
SPTLC2	9517	3.23	1e-06
ERMP1	79956	3.23	1e-06
HEATR1	55127	3.23	1e-06
LCP1	3936	3.24	1e-06
ZNF148	7707	3.24	1e-06
PTBP3	9991	3.25	1e-06
AKT1S1	84335	3.26	1e-06
SMCHD1	23347	3.26	1e-06
F11R	50848	3.29	1e-06
CD164	8763	3.3	1e-06
ABHD17C	58489	3.31	1e-06
DICER1	23405	3.32	1e-06
NAMPT	10135	3.33	1e-06
MCUR1	63933	3.36	1e-06
AIDA	64853	3.37	1e-06
FBXO28	23219	3.39	1e-06
ARIH1	25820	3.39	1e-06
PIK3CA	5290	3.4	1e-06
RAB10	10890	3.4	1e-06
SSR1	6745	3.41	1e-06
PTER	9317	3.41	1e-06
WAPL	23063	3.42	1e-06
PTPN12	5782	3.46	1e-06
DESI1	27351	3.46	1e-06
CDC6	990	3.47	1e-06
DEPDC1	55635	3.52	1e-06
C3orf38	285237	3.54	1e-06
DPH3	285381	3.57	1e-06
GCH1	2643	3.62	1e-06
OIP5	11339	3.66	1e-06
ZNF652	22834	3.67	1e-06
ZBED4	9889	3.68	1e-06
KIF2A	3796	3.7	1e-06
CREB1	1385	3.74	1e-06
ETNK1	55500	3.74	1e-06
SMARCC1	6599	3.78	1e-06
PIK3C2A	5286	3.8	1e-06
CCL2	6347	3.81	1e-06
CNN3	1266	3.82	1e-06
PLOD2	5352	3.82	1e-06
RAB27A	5873	3.82	1e-06
PLEKHF2	79666	3.83	1e-06
VAMP3	9341	3.89	1e-06
UTP4	84916	3.89	1e-06
EPT1	85465	3.9	1e-06
PDE7A	5150	3.91	1e-06
CEBPG	1054	3.95	1e-06
SLC16A1	6566	3.97	1e-06
DESI2	51029	3.97	1e-06
TRPS1	7227	4	1e-06
DONSON	29980	4.01	1e-06
POGK	57645	4.06	1e-06
UGT8	7368	4.18	1e-06
MAPRE1	22919	4.19	1e-06
TSN	7247	4.31	1e-06
AKIRIN1	79647	4.58	1e-06
RAP2B	5912	4.69	1e-06
VMP1	81671	4.69	1e-06
MCM10	55388	4.78	1e-06
LARP4B	23185	4.87	1e-06
COL12A1	1303	4.96	1e-06
EZH2	2146	5.59	1e-06
ESRP1	54845	6.08	1e-06
ACTB	60	6.33	1e-06
ANP32E	81611	7.73	1e-06
FZD8, frizzled receptor 8; TNBC, triple-negative breast cancer; adjpv, adjusted P-value.

## Sheet: hsa-miR-124-3p
				Table SII. Upstream regulatory microRNAs related to FZD8 and their target genes in TNBC.
				hsa-mR-124-3p
Symbol	Entrez	Logfc	Adjpv
	6457	-6.36	1e-06
ZBTB16	7704	-5.38	1e-06
HOXA5	3202	-5.36	1e-06
SCN4B	6330	-4.98	1e-06
TGFBR3	7049	-4.37	1e-06
SLC7A2	6542	-4.11	1e-06
PRICKLE2	166336	-4.03	1e-06
NFIA	4774	-3.85	1e-06
EDNRB	1910	-3.62	1e-06
PDE2A	5138	-3.57	1e-06
JAM2	58494	-3.56	1e-06
LIPE	3991	-3.4	1e-06
GNAL	2774	-3.3	1e-06
GPAM	57678	-3.25	1e-06
MYZAP	100820829	-3.21	1e-06
CAV1	857	-3.06	1e-06
GNG2	54331	-3.04	1e-06
C1orf21	81563	-3.02	1e-06
MYH11	4629	-2.97	1e-06
ZCCHC24	219654	-2.93	1e-06
GLI3	2737	-2.89	1e-06
PCDH19	57526	-2.87	1e-06
SETBP1	26040	-2.87	1e-06
PDGFA	5154	-2.86	1e-06
DCHS1	8642	-2.85	1e-06
SYNPO2	171024	-2.84	1e-06
HLF	3131	-2.77	1e-06
SLC40A1	30061	-2.75	1e-06
CYBRD1	79901	-2.74	1e-06
ITGA7	3679	-2.73	1e-06
THRB	7068	-2.73	1e-06
FIGN	55137	-2.7	1e-06
BCL6	604	-2.6	1e-06
SLC27A1	376497	-2.6	1e-06
FBRSL1	57666	-2.6	1e-06
APH1B	83464	-2.56	1e-06
RAP1A	5906	-2.51	1e-06
LIMCH1	22998	-2.47	4.32e-05
AHNAK	79026	-2.46	1e-06
NR3C2	4306	-2.45	1e-06
TMEM178A	130733	-2.43	1e-06
FGD5	152273	-2.37	1e-06
KIF13B	23303	-2.34	1e-06
PDE3B	5140	-2.32	1e-06
GSN	2934	-2.3	1e-06
CREBRF	153222	-2.27	1e-06
RALGPS2	55103	-2.26	3.19e-05
PLEKHA6	22874	-2.26	1e-06
ATP7A	538	-2.22	1e-06
PALM	5064	-2.22	1e-06
MITF	4286	-2.19	1e-06
NAT8L	339983	-2.19	1e-06
ALCAM	214	-2.17	0.000945
CACNA2D1	781	-2.14	1e-06
CTDSP1	58190	-2.09	1e-06
PLEKHH1	57475	-2.07	3.2e-06
INO80C	125476	-2.07	1e-06
LIMA1	51474	-2.06	1.54e-06
GNAI1	2770	-2.04	1.07e-05
ARRB1	408	-2.03	1e-06
ACVR2A	92	-2.01	1e-06
ALDH6A1	4329	-2	1e-06
NAP1L5	266812	-2	0.000496
IL17RD	54756	-2	0.00148
RHOU	58480	-2	5.88e-06
KLF15	28999	-2	1e-06
FSTL1	11167	-1.99	1e-06
EBF1	1879	-1.98	1e-06
CPS1	1373	-1.97	1e-06
NDFIP1	80762	-1.97	1e-06
JADE1	79960	-1.91	1e-06
FKBP1B	2281	-1.9	1.11e-06
DGAT2	84649	-1.9	0.000325
AMOTL1	154810	-1.9	1e-06
TSHZ2	128553	-1.9	1e-06
CCDC50	152137	-1.89	1e-06
SH3KBP1	30011	-1.89	8.12e-05
STEAP2	261729	-1.89	0.00014
SLC7A8	23428	-1.88	1e-06
ZBTB20	26137	-1.87	1e-06
GOLGA8N	643699	-1.84	1e-06
DUSP6	1848	-1.83	0.000469
CEP68	23177	-1.83	1e-06
DAAM2	23500	-1.83	2.1e-05
EBF3	253738	-1.83	0.000115
MAP1B	4131	-1.81	0.00033
NPAT	4863	-1.79	1e-06
NFIX	4784	-1.78	1.04e-06
GALNT10	55568	-1.78	0.000265
MYRIP	25924	-1.78	0.000111
ZBTB7C	201501	-1.77	0.00382
HIC1	3090	-1.76	1e-06
PPM1F	9647	-1.76	1e-06
CTDSPL	10217	-1.75	1.94e-06
SPRY1	10252	-1.75	1e-06
FAM174B	400451	-1.74	1e-06
SEMA5A	9037	-1.74	1e-06
SLK	9748	-1.74	1e-06
ECI2	10455	-1.73	0.000958
FBXL7	23194	-1.73	1e-06
AR	367	-1.72	1e-06
ZDHHC2	51201	-1.72	0.00153
RXRA	6256	-1.71	0.000446
SPRY2	10253	-1.71	0.00234
DHDDS	79947	-1.71	1e-06
MARK1	4139	-1.7	1e-06
ACADVL	37	-1.69	1e-06
B4GALT6	9331	-1.69	1.33e-06
ECE1	1889	-1.67	1e-06
BACE1	23621	-1.67	1e-06
PNPLA2	57104	-1.67	1e-06
FAM219B	57184	-1.67	1e-06
CLIP3	25999	-1.67	1e-06
ETV1	2115	-1.66	0.000909
SGSM2	9905	-1.65	1e-06
CLEC14A	161198	-1.65	1e-06
NHSL2	340527	-1.62	1e-06
TRIM9	114088	-1.62	9.97e-05
GPAT3	84803	-1.62	0.00389
BICC1	80114	-1.61	0.00108
DYM	54808	-1.6	1e-06
ITGA3	3675	-1.59	1e-06
NRG2	9542	-1.58	1e-06
TACC2	10579	-1.56	3.35e-05
ELL2	22936	-1.54	0.000446
NFIC	4782	-1.53	1e-06
COL4A3BP	10087	-1.53	1e-06
TACC1	6867	-1.52	1.41e-05
SUGT1	10910	-1.52	1e-06
MAP3K3	4215	-1.51	1e-06
ADGRA2	25960	-1.51	1e-06
FRS2	10818	-1.5	5.55e-05
ZNF503	84858	-1.5	0.0005
ELOVL5	60481	-1.5	1.44e-06
MYNN	55892	1.5	1e-06
RRP36	88745	1.5	1e-06
ANXA7	310	1.51	1e-06
FEM1B	10116	1.51	1e-06
PAPSS2	9060	1.52	0.00195
RCOR1	23186	1.52	1e-06
SEC22C	9117	1.53	1e-06
BAG5	9529	1.53	1e-06
TTC37	9652	1.53	1e-06
PRDM2	7799	1.54	1e-06
RAPH1	65059	1.55	0.0003
CHMP2B	25978	1.56	1e-06
PIGM	93183	1.56	1e-06
BICD1	636	1.57	0.000113
SBNO2	22904	1.57	1e-06
CAPNS1	826	1.58	1e-06
EAF1	85403	1.58	1e-06
MAP2K4	6416	1.59	1e-06
TMEM181	57583	1.59	7.8e-06
NIPA1	123606	1.59	1e-06
EIF3J	8669	1.6	1e-06
RAB11FIP1	80223	1.6	0.000125
DCUN1D5	84259	1.6	1e-06
ZNF292	23036	1.6	1e-06
UBE2I	7329	1.61	1e-06
ICMT	23463	1.61	1e-06
NUDCD2	134492	1.62	1e-06
RSRC2	65117	1.62	1e-06
OVOL1	5017	1.63	0.000658
MSL2	55167	1.63	1e-06
DPY19L4	286148	1.63	1e-06
E2F6	1876	1.64	1e-06
ELF3	1999	1.64	0.000572
ORC2	4999	1.64	1e-06
ITFG1	81533	1.64	1e-06
USP48	84196	1.64	1e-06
TCF3	6929	1.65	1e-06
GIT2	9815	1.65	1e-06
CSTF2	1478	1.66	1e-06
AP1M2	10053	1.66	0.00444
CHD1	1105	1.67	1e-06
FAM199X	139231	1.67	1.06e-06
EDC3	80153	1.67	1e-06
USP24	23358	1.67	1e-06
SERP1	27230	1.67	1e-06
PGM2L1	283209	1.68	9.64e-06
TRAM2	9697	1.69	1e-06
ZXDC	79364	1.69	1e-06
PHIP	55023	1.69	1e-06
ZCCHC14	23174	1.69	1e-06
PHKA1	5255	1.7	1e-06
CDCP1	64866	1.7	0.000224
TFDP2	7029	1.71	1.5e-06
SERTAD4	56256	1.71	0.00126
THEM6	51337	1.72	0.000243
SSH1	54434	1.72	1e-06
CHD7	55636	1.72	2.35e-05
PCDH17	27253	1.72	1e-06
PAPD4	167153	1.73	1e-06
SORD	6652	1.73	1.02e-06
USP47	55031	1.73	1e-06
SLC35A3	23443	1.73	1e-06
SDF2L1	23753	1.74	1e-06
KPNB1	3837	1.75	1e-06
PPARA	5465	1.75	1e-06
GPR137B	7107	1.75	1e-06
BLOC1S6	26258	1.75	1e-06
SLAIN2	57606	1.76	1e-06
HIPK1	204851	1.77	1e-06
GDAP2	54834	1.77	1e-06
PBX3	5090	1.78	5.92e-06
GFPT2	9945	1.78	0.00278
ICE2	79664	1.78	1e-06
SLC44A1	23446	1.78	1e-06
CDK4	1019	1.79	1e-06
FMR1	2332	1.79	1e-06
MYO5A	4644	1.79	1e-06
ST8SIA1	6489	1.79	0.00722
QSER1	79832	1.79	1e-06
METTL13	51603	1.79	1e-06
CNOT11	55571	1.79	1e-06
NR1D2	9975	1.81	5.48e-06
ZFAND3	60685	1.81	1e-06
HIVEP1	3096	1.82	1e-06
CEP350	9857	1.82	1e-06
MTF2	22823	1.82	1e-06
LCLAT1	253558	1.82	1e-06
GAPVD1	26130	1.82	1e-06
MFSD14A	64645	1.82	1e-06
UPF3B	65109	1.82	1e-06
ARG2	384	1.83	0.000681
GPD2	2820	1.83	1e-06
USO1	8615	1.83	1e-06
ATP6V1G1	9550	1.83	1e-06
SPPL2A	84888	1.83	1e-06
STEAP3	55240	1.83	8.9e-05
PLXNA3	55558	1.83	1e-06
CSPP1	79848	1.84	1e-06
UBR7	55148	1.84	1e-06
SLF2	55719	1.84	1e-06
PALLD	23022	1.84	8.68e-05
SLC50A1	55974	1.84	1e-06
TXLNA	200081	1.86	1e-06
LOX	4015	1.86	0.00168
SUB1	10923	1.86	1e-06
RNF19A	25897	1.86	1e-06
MYO10	4651	1.87	1e-06
BCL2L13	23786	1.87	1e-06
SPAG9	9043	1.88	1e-06
SEC61A2	55176	1.88	1e-06
PTPN11	5781	1.89	1e-06
FXR1	8087	1.89	1e-06
CDK12	51755	1.89	1e-06
KLHL42	57542	1.89	4.39e-06
FOXQ1	94234	1.89	0.02
MBOAT2	129642	1.89	1e-06
AP1G1	164	1.9	1e-06
CISD2	493856	1.9	1e-06
HS2ST1	9653	1.9	1e-06
SH3GLB1	51100	1.9	1e-06
FAR1	84188	1.9	1e-06
TCEB1	6921	1.92	1e-06
ITSN2	50618	1.92	1e-06
ABHD3	171586	1.93	1e-06
SFT2D2	375035	1.94	1e-06
RASAL2	9462	1.95	1e-06
TBC1D5	9779	1.95	1e-06
PGM2	55276	1.95	1e-06
CCT5	22948	1.95	1e-06
SLC31A1	1317	1.96	1e-06
NDFIP2	54602	1.96	1e-06
CNOT1	23019	1.96	1e-06
DNMT3B	1789	1.97	1.07e-06
RALA	5898	1.97	1e-06
SP1	6667	1.97	5.76e-06
MFSD14B	84641	1.97	1e-06
VPS13A	23230	1.97	1e-06
RYBP	23429	1.97	1e-06
DAP	1611	1.98	1e-06
IRF1	3659	1.98	0.00174
MXD1	4084	1.99	1e-06
EXOSC2	23404	1.99	1e-06
PAFAH1B1	5048	2	1e-06
C21orf91	54149	2	4.66e-06
WSB2	55884	2	1e-06
TMEM267	64417	2	1e-06
MAPK14	1432	2.01	1e-06
KRAS	3845	2.01	1e-06
CLIP1	6249	2.01	1e-06
TMEM248	55069	2.01	1e-06
AGO3	192669	2.01	1e-06
PAPOLG	64895	2.01	1e-06
HMGA1	3159	2.02	1e-06
SHC1	6464	2.02	1e-06
EFCAB14	9813	2.02	1e-06
SEC63	11231	2.03	1e-06
CCDC117	150275	2.03	1e-06
WDFY3	23001	2.03	1e-06
CERS2	29956	2.03	1e-06
OSBP	5007	2.05	1e-06
GSK3B	2932	2.06	1e-06
LPP	4026	2.06	1e-06
PTGFRN	5738	2.06	1e-06
CPNE3	8895	2.06	1e-06
PDCD10	11235	2.06	1e-06
AGPAT5	55326	2.06	1e-06
ZBTB38	253461	2.06	1e-06
BEND3	57673	2.06	1e-06
ATRX	546	2.07	1e-06
CASK	8573	2.07	1e-06
OXSR1	9943	2.07	1e-06
MIB1	57534	2.07	1e-06
MAT2A	4144	2.08	1e-06
FOXK2	3607	2.09	1e-06
SOS1	6654	2.09	1e-06
CTSZ	1522	2.1	1e-06
TXNRD1	7296	2.1	1e-06
SLC44A2	57153	2.1	1e-06
COL4A1	1282	2.11	5.5e-06
STT3A	3703	2.11	1e-06
G3BP1	10146	2.11	1e-06
MFSD6	54842	2.11	4.55e-06
NXT2	55916	2.11	0.000358
MTDH	92140	2.11	1e-06
PLAGL2	5326	2.12	1e-06
SOCS3	9021	2.12	9.48e-06
NANP	140838	2.12	1e-06
E2F3	1871	2.13	1e-06
VDAC3	7419	2.13	1e-06
SIGMAR1	10280	2.13	1e-06
ENY2	56943	2.13	1e-06
SHC4	399694	2.14	0.0204
RASD2	23551	2.14	0.000306
RRBP1	6238	2.15	1e-06
NEK6	10783	2.15	1e-06
GOLT1B	51026	2.15	1e-06
ARFIP1	27236	2.15	9.45e-06
P4HA1	5033	2.16	1e-06
TMED8	283578	2.16	1e-06
SBK1	388228	2.16	1e-06
SVIP	258010	2.16	0.000153
CCDC71L	168455	2.17	1e-06
GRSF1	2926	2.18	1e-06
SLC7A1	6541	2.18	1e-06
SLC29A1	2030	2.19	0.000335
TJP1	7082	2.19	1e-06
VAMP4	8674	2.19	1e-06
USP14	9097	2.19	1e-06
RHOQ	23433	2.19	1e-06
KDM5A	5927	2.2	1e-06
IMPACT	55364	2.2	1e-06
ATF7IP	55729	2.2	1e-06
SMCO4	56935	2.2	1e-06
RCAN1	1827	2.21	2.38e-05
DENR	8562	2.21	1e-06
ANKIB1	54467	2.21	1e-06
VANGL2	57216	2.21	2.51e-05
STARD4	134429	2.22	1e-06
STAG2	10735	2.22	1e-06
DAPK1	1612	2.23	1e-06
NAB1	4664	2.23	1e-06
TMCO3	55002	2.24	1e-06
RNF114	55905	2.24	1e-06
KLF6	1316	2.25	1e-06
ST3GAL1	6482	2.25	2.69e-05
SOCS5	9655	2.25	1e-06
YIPF6	286451	2.25	1e-06
THUMPD3	25917	2.25	1e-06
PPM1A	5494	2.26	1e-06
AGPS	8540	2.26	1e-06
LMO4	8543	2.26	1e-06
AMMECR1	9949	2.26	1e-06
AP3M1	26985	2.26	1e-06
STAT3	6774	2.27	1e-06
RBM12	10137	2.27	1e-06
BICD2	23299	2.27	1e-06
NUP58	9818	2.28	1e-06
ENAH	55740	2.29	1e-06
KIAA1147	57189	2.29	1e-06
UBE2G2	7327	2.3	1e-06
CDC73	79577	2.3	1e-06
RAI14	26064	2.3	1e-06
HIPK2	28996	2.3	1e-06
C1GALT1	56913	2.31	1e-06
ABL2	27	2.32	1e-06
PCCB	5096	2.32	1e-06
WNK1	65125	2.32	1e-06
BCAT1	586	2.33	1e-06
TMEM50B	757	2.33	1e-06
PLP2	5355	2.33	1e-06
RAP2A	5911	2.34	1e-06
TMEM168	64418	2.34	1e-06
PRRC1	133619	2.35	1e-06
AGFG1	3267	2.35	1e-06
PEG3	5178	2.35	0.02
ADAM19	8728	2.35	1e-06
TTL	150465	2.35	1e-06
CSTF3	1479	2.36	1e-06
MAGT1	84061	2.36	1e-06
TFCP2L1	29842	2.36	0.000204
UBE2V2	7336	2.38	1e-06
CBFB	865	2.39	1e-06
GRB2	2885	2.39	1e-06
DHX36	170506	2.39	1e-06
LARP1	23367	2.39	1e-06
CXADR	1525	2.4	0.000148
RPS6KB1	6198	2.4	1e-06
CMTM6	54918	2.4	1e-06
RAB29	8934	2.41	1e-06
ANXA4	307	2.42	1e-06
ARHGDIA	396	2.42	1e-06
MDK	4192	2.42	1.32e-06
RAB2A	5862	2.42	1e-06
NAA15	80155	2.42	1e-06
ACOX1	51	2.43	1e-06
SNX2	6643	2.43	1e-06
TMEM45A	55076	2.43	0.000452
IDE	3416	2.44	1e-06
RYK	6259	2.45	1e-06
SDAD1	55153	2.45	1e-06
GMCL1	64395	2.45	1e-06
SURF4	6836	2.46	1e-06
IMPAD1	54928	2.46	1e-06
ZNF318	24149	2.46	1e-06
TET3	200424	2.47	1e-06
RELA	5970	2.47	1e-06
RAB14	51552	2.47	1e-06
TIPRL	261726	2.47	1e-06
C4orf46	201725	2.48	1e-06
KIF26B	55083	2.48	1.07e-05
GGA2	23062	2.48	1e-06
TAOK1	57551	2.48	1e-06
DNASE2	1777	2.49	1e-06
IQGAP1	8826	2.49	1e-06
OSBPL3	26031	2.49	1e-06
ZNF451	26036	2.49	1e-06
CYLD	1540	2.52	1e-06
FOSL2	2355	2.52	1e-06
TUBG1	7283	2.52	1e-06
ATP6V0A2	23545	2.53	1e-06
WDR48	57599	2.53	1e-06
ABCA1	19	2.54	2.21e-06
COPZ1	22818	2.54	1e-06
RB1CC1	9821	2.58	1e-06
ARPP19	10776	2.58	1e-06
CPD	1362	2.59	1e-06
DCTN4	51164	2.6	1e-06
PLEC	5339	2.61	1e-06
USP1	7398	2.61	1e-06
KDM1B	221656	2.61	1e-06
CDC27	996	2.63	1e-06
PDE4B	5142	2.63	6.23e-05
MAP7	9053	2.63	1e-06
IRF2BP2	359948	2.63	1e-06
RBMS1	5937	2.64	1e-06
WDFY1	57590	2.64	1e-06
PEA15	8682	2.65	1e-06
STK26	51765	2.65	3.36e-06
ARF6	382	2.66	1e-06
ZNF706	51123	2.66	1e-06
JPH1	56704	2.67	1e-06
MAN2A1	4124	2.68	1e-06
ITPR3	3710	2.71	1e-06
STRN	6801	2.73	1e-06
SGPL1	8879	2.73	1e-06
CDK6	1021	2.75	1e-06
N4BP1	9683	2.75	1e-06
YME1L1	10730	2.75	1e-06
PUS7	54517	2.75	1e-06
SDC2	6383	2.76	2.53e-06
BCL2L11	10018	2.76	1e-06
SAR1B	51128	2.76	1e-06
NEMP1	23306	2.76	1e-06
QKI	9444	2.78	1e-06
SPTLC1	10558	2.78	1e-06
TOR3A	64222	2.78	1e-06
UBA6	55236	2.79	1e-06
MPZL1	9019	2.8	1e-06
G3BP2	9908	2.8	1e-06
OGFRL1	79627	2.8	1e-06
PRPS1	5631	2.81	1e-06
KDELR2	11014	2.81	1e-06
ISG20L2	81875	2.81	1e-06
TRMT6	51605	2.81	1e-06
COTL1	23406	2.81	1e-06
ESYT2	57488	2.82	1e-06
NUFIP2	57532	2.83	1e-06
ATL3	25923	2.83	1e-06
VANGL1	81839	2.84	1e-06
UBE2W	55284	2.86	1e-06
EFNA5	1946	2.87	2.47e-06
PRKX	5613	2.91	1e-06
FMNL2	114793	2.91	1e-06
AK2	204	2.92	1e-06
OSBPL11	114885	2.92	1e-06
UBE2B	7320	2.96	1e-06
FGFR1OP	11116	2.96	1e-06
CBX5	23468	2.96	1e-06
NFIB	4781	2.98	2.1e-05
ZFP36L2	678	2.99	1e-06
DYRK2	8445	2.99	1e-06
DCUN1D1	54165	2.99	1e-06
NIPBL	25836	3	1e-06
CNIH4	29097	3	1e-06
SLBP	7884	3.01	1e-06
DCAF7	10238	3.01	1e-06
TIA1	7072	3.02	1e-06
RNF213	57674	3.03	1e-06
TAB2	23118	3.05	1e-06
KPNA3	3839	3.08	1e-06
SYPL1	6856	3.08	1e-06
PRPF40A	55660	3.08	1e-06
CEP152	22995	3.08	1e-06
MACF1	23499	3.08	1e-06
PARP9	83666	3.1	1e-06
CACUL1	143384	3.11	1e-06
ARFGEF2	10564	3.12	1e-06
CDH11	1009	3.13	1e-06
FAM20B	9917	3.16	1e-06
ITGB1	3688	3.17	1e-06
TFRC	7037	3.17	1e-06
XPO5	57510	3.17	1e-06
C16orf72	29035	3.18	1e-06
PSEN1	5663	3.19	1e-06
IGF2R	3482	3.2	1e-06
LMNB1	4001	3.2	1e-06
SLC33A1	9197	3.22	1e-06
MAPKAPK2	9261	3.22	1e-06
SIK1	150094	3.22	1e-06
CNKSR3	154043	3.22	1e-06
SPTLC2	9517	3.23	1e-06
ERMP1	79956	3.23	1e-06
HEATR1	55127	3.23	1e-06
LCP1	3936	3.24	1e-06
ZNF148	7707	3.24	1e-06
PTBP3	9991	3.25	1e-06
AKT1S1	84335	3.26	1e-06
USP38	84640	3.26	1e-06
SMCHD1	23347	3.26	1e-06
VAMP7	6845	3.28	1e-06
VPS35	55737	3.28	1e-06
F11R	50848	3.29	1e-06
CD164	8763	3.3	1e-06
BID	637	3.31	1e-06
NUP210	23225	3.31	1e-06
ABHD17C	58489	3.31	1e-06
DICER1	23405	3.32	1e-06
NAMPT	10135	3.33	1e-06
GNAI3	2773	3.35	1e-06
SYNCRIP	10492	3.35	1e-06
MCUR1	63933	3.36	1e-06
AIDA	64853	3.37	1e-06
UBE2G1	7326	3.39	1e-06
FBXO28	23219	3.39	1e-06
ARIH1	25820	3.39	1e-06
PIK3CA	5290	3.4	1e-06
RAB10	10890	3.4	1e-06
SSR1	6745	3.41	1e-06
PTER	9317	3.41	1e-06
WAPL	23063	3.42	1e-06
PTPN12	5782	3.46	1e-06
CLDND1	56650	3.46	1e-06
DESI1	27351	3.46	1e-06
CDC6	990	3.47	1e-06
DDX3X	1654	3.51	1e-06
SLC25A39	51629	3.52	1e-06
DEPDC1	55635	3.52	1e-06
STK38	11329	3.53	1e-06
SLC25A37	51312	3.54	1e-06
C3orf38	285237	3.54	1e-06
DPH3	285381	3.57	1e-06
GCH1	2643	3.62	1e-06
FAM76A	199870	3.66	1e-06
OIP5	11339	3.66	1e-06
SLC17A5	26503	3.66	1e-06
KPNA1	3836	3.67	1e-06
ZNF652	22834	3.67	1e-06
ZBED4	9889	3.68	1e-06
YTHDF3	253943	3.68	1e-06
KIF2A	3796	3.7	1e-06
RAD54B	25788	3.7	1e-06
HTATIP2	10553	3.71	1e-06
TMEM245	23731	3.71	1e-06
LAD1	3898	3.73	1e-06
DCLRE1C	64421	3.73	1e-06
CREB1	1385	3.74	1e-06
ETNK1	55500	3.74	1e-06
SMARCC1	6599	3.78	1e-06
RAB22A	57403	3.78	1e-06
PIK3C2A	5286	3.8	1e-06
CCL2	6347	3.81	1e-06
CNN3	1266	3.82	1e-06
PLOD2	5352	3.82	1e-06
RAB27A	5873	3.82	1e-06
KCTD5	54442	3.82	1e-06
PLEKHF2	79666	3.83	1e-06
KPNA4	3840	3.87	1e-06
VAMP3	9341	3.89	1e-06
UTP4	84916	3.89	1e-06
EPT1	85465	3.9	1e-06
PDE7A	5150	3.91	1e-06
NRAS	4893	3.92	1e-06
CEBPG	1054	3.95	1e-06
SLC16A1	6566	3.97	1e-06
DESI2	51029	3.97	1e-06
ASF1A	25842	3.97	1e-06
TRPS1	7227	4	1e-06
DONSON	29980	4.01	1e-06
DDA1	79016	4.05	1e-06
POGK	57645	4.06	1e-06
GMFB	2764	4.11	1e-06
UGT8	7368	4.18	1e-06
MAPRE1	22919	4.19	1e-06
MAPK1	5594	4.22	1e-06
RDH10	157506	4.24	1e-06
RHOA	387	4.26	1e-06
TSN	7247	4.31	1e-06
E2F5	1875	4.34	1e-06
UHMK1	127933	4.41	1e-06
SUV39H2	79723	4.44	1e-06
AKIRIN1	79647	4.58	1e-06
PHF19	26147	4.63	1e-06
RAP2B	5912	4.69	1e-06
VMP1	81671	4.69	1e-06
MCM10	55388	4.78	1e-06
LARP4B	23185	4.87	1e-06
PPIF	10105	4.92	1e-06
COL12A1	1303	4.96	1e-06
DSG2	1829	5.2	1e-06
CALU	813	5.22	1e-06
CBX2	84733	5.32	1e-06
VCAN	1462	5.54	1e-06
EZH2	2146	5.59	1e-06
CDCA7	83879	5.67	1e-06
ESRP1	54845	6.08	1e-06
ACTB	60	6.33	1e-06
ANP32E	81611	7.73	1e-06
FZD8, frizzled receptor 8; TNBC, triple-negative breast cancer; adjpv, adjusted P-value.
